# Supplementary material
Source: publisher figshare collection journal article supplement (https://acs.figshare.com/ndownloader/files/9254977)
Supplement: Supplementary file 1 [file 9254977]

## Supporting Information

### Synthesis of mesoporous $\text{Co}^{2+}$ doped $\text{TiO}_2$ nanodisks derived from metal organic frameworks with improved sodium storage performance

Zhensheng Hong,<sup>\*, †, ‡, ⊥</sup> Meiling Kang,<sup>†, ⊥</sup> Xiaohui Chen,<sup>†</sup> Kaiqiang Zhou,<sup>†</sup> Zhigao Huang,<sup>†, ‡</sup>  
and Mingdeng Wei<sup>§</sup>

<sup>†</sup> Fujian Provincial Key Laboratory of Quantum Manipulation and New Energy Materials, College of Physics and Energy, Fujian Normal University, Fuzhou, Fujian 350117, China

<sup>‡</sup> Fujian Provincial Collaborative Innovation Center for Optoelectronic Semiconductors and Efficient Devices, Xiamen, 361005, China

<sup>§</sup> Institute of Advanced Energy Materials, Fuzhou University, Fuzhou, Fujian 350002, China

\*Corresponding Authors: E-mail: winter0514@163.com

<sup>⊥</sup> These authors contributed equally to this work

## EXPERIMENTAL SECTION

### *1. Materials synthesis*

MIL-125(Ti)-Co was fabricated by a modified method for the synthesis of MIL-125(Ti) reported in previous literature.<sup>28</sup> Terephthalic acid ( $\text{H}_2\text{BDC}$ ) (3 g) was dissolved into a solution containing dimethylformamide (DMF) (54 ml) and MeOH (6 ml) solution through stirring for 10 min. Tetra-n-butyl titanate  $\text{Ti}(\text{OC}_4\text{H}_9)_4$  (1.5 ml) was added into the above solution and was stirred for 15 min. Then, a certain amount of  $\text{CoCl}_2 \cdot 6\text{H}_2\text{O}$  (16 or 32 mg) was added and keep stirring for 10 min. The above solution was transferred to a 100 ml Teflon liner and heated at  $150^\circ\text{C}$  for 48 hours.

After reaction, the resultant suspension was filtered, washed with DMF and methanol. The resulting precipitate was collected by centrifugation, washed thoroughly with distilled water and ethanol, dried at 60 °C overnight. The samples were denoted as MIL-125(Ti)-16Co and MIL-125(Ti)-32Co, respectively. The as-prepared MIL-125(Ti) was synthesized through the same procedure without the addition of  $\text{CoCl}_2 \cdot 6\text{H}_2\text{O}$ . Finally,  $\text{TiO}_2$  and  $\text{Co}^{2+}$  doped  $\text{TiO}_2$  with mesoporous structure were harvested by calcining of MIL-125(Ti) and MIL-125(Ti)-Co at 400 °C for 5 h under air condition, respectively. The corresponding samples were denoted as  $\text{TiO}_2$ ,  $\text{TiO}_2$ -16Co and  $\text{TiO}_2$ -32Co.

## *2.Characterizations of the samples*

X-ray diffraction (XRD) patterns were obtained from the measurement on a Rigaku Ultima IV diffractometer, using Ni filtered Cu K $\alpha$  radiation ( $\lambda = 1.5406 \text{ \AA}$ ). Scanning electron microscopy (SEM, S8010 instrument) and transmission electron microscopy (TEM, FEI F20 S-TWIN instrument) were used for the characterization of morphology and structure of the samples.  $\text{N}_2$  adsorption-desorption analysis was measured on a Micro-meritics TriStar II 3020 instrument (USA). Pore size distribution plots were obtained by the Barrett-Joyner-Halenda (BJH) method. X-ray photoelectron spectroscopy (XPS) measurements were performed on a PHI Quantum2000 XPS system with a monochromatic Al K $\alpha$  source and a charge neutralizer. The surface potential measurements were conducted by Kelvin probe atomic force microscopy (KPAFM) (Bruker Dimension Icon, Germany)

## *3. Electrochemical measurements*

For the electrochemical measurement of Na-ion storage, the active material was admixed with super-P and polyvinylidene fluoride (PVDF) binder additive in a weight ratio of 70:15:15. The

mixture was pressed on copper foil circular flakes as working electrodes (WE), and dried at 120 °C in vacuum for 12 h. Na-ion cells were assembled in coin-type cells (CR 2025) with a Na metal foil as the negative electrode, glass fiber separator (Whatman GF/F), and 1 M NaClO<sub>4</sub> in ethylene carbonate (EC) and diethyl carbonate (DEC) (1/1 in volume) as the electrolyte. The cells were fabricated in a glove box filled with highly pure argon gas (O<sub>2</sub> and H<sub>2</sub>O levels < 1 ppm), and charge/discharge profiles were tested on a Land automatic batteries tester (Land CT 2001A, Wuhan, China). Cyclic voltammetry (CV) measurements and electrochemical impedance spectroscopy (EIS) were performed on Zennium (Zahner).

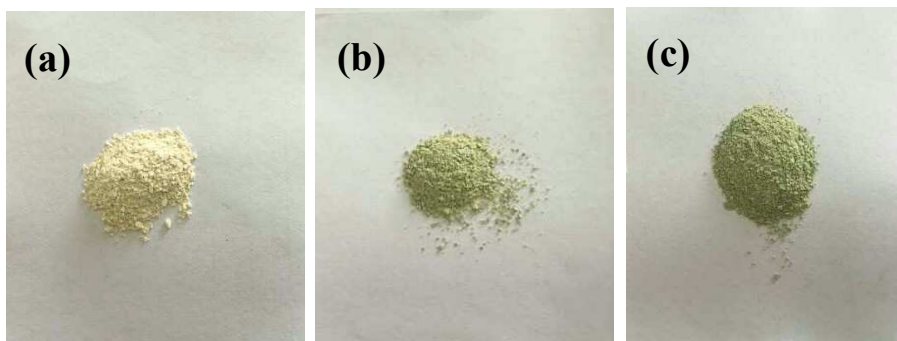

**Figure S1.** Photographs of (a) TiO<sub>2</sub>, (b) TiO<sub>2</sub>-16Co and (c) TiO<sub>2</sub>-32Co.

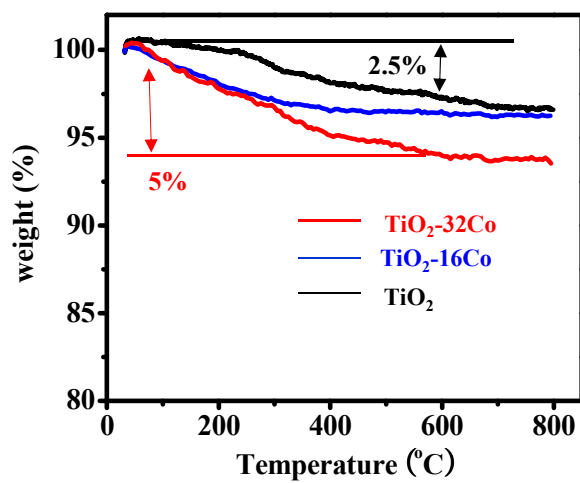

**Figure S2.** TG curves of  $\text{TiO}_2$ ,  $\text{TiO}_2\text{-16Co}$  and (c)  $\text{TiO}_2\text{-32Co}$ .

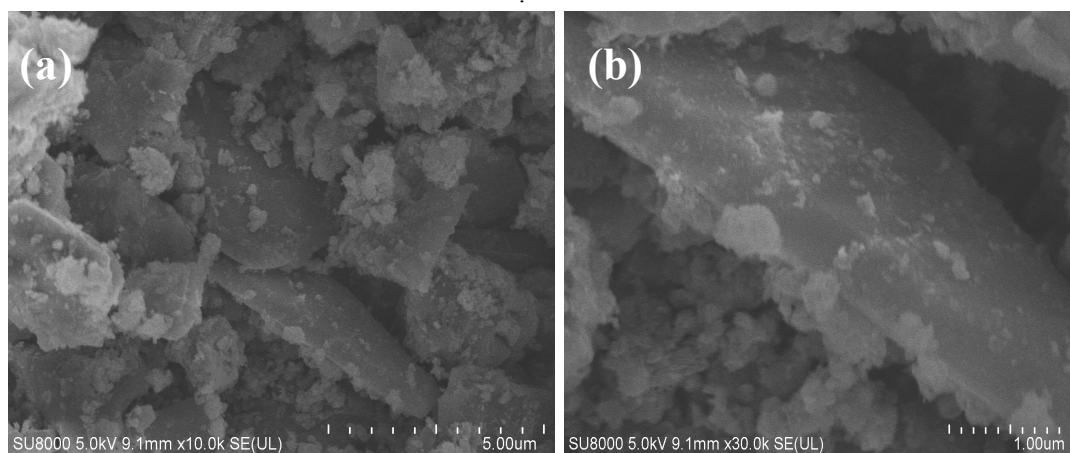

**Figure S3.** SEM (a, b) images of MIL-125(Ti)-64Co.

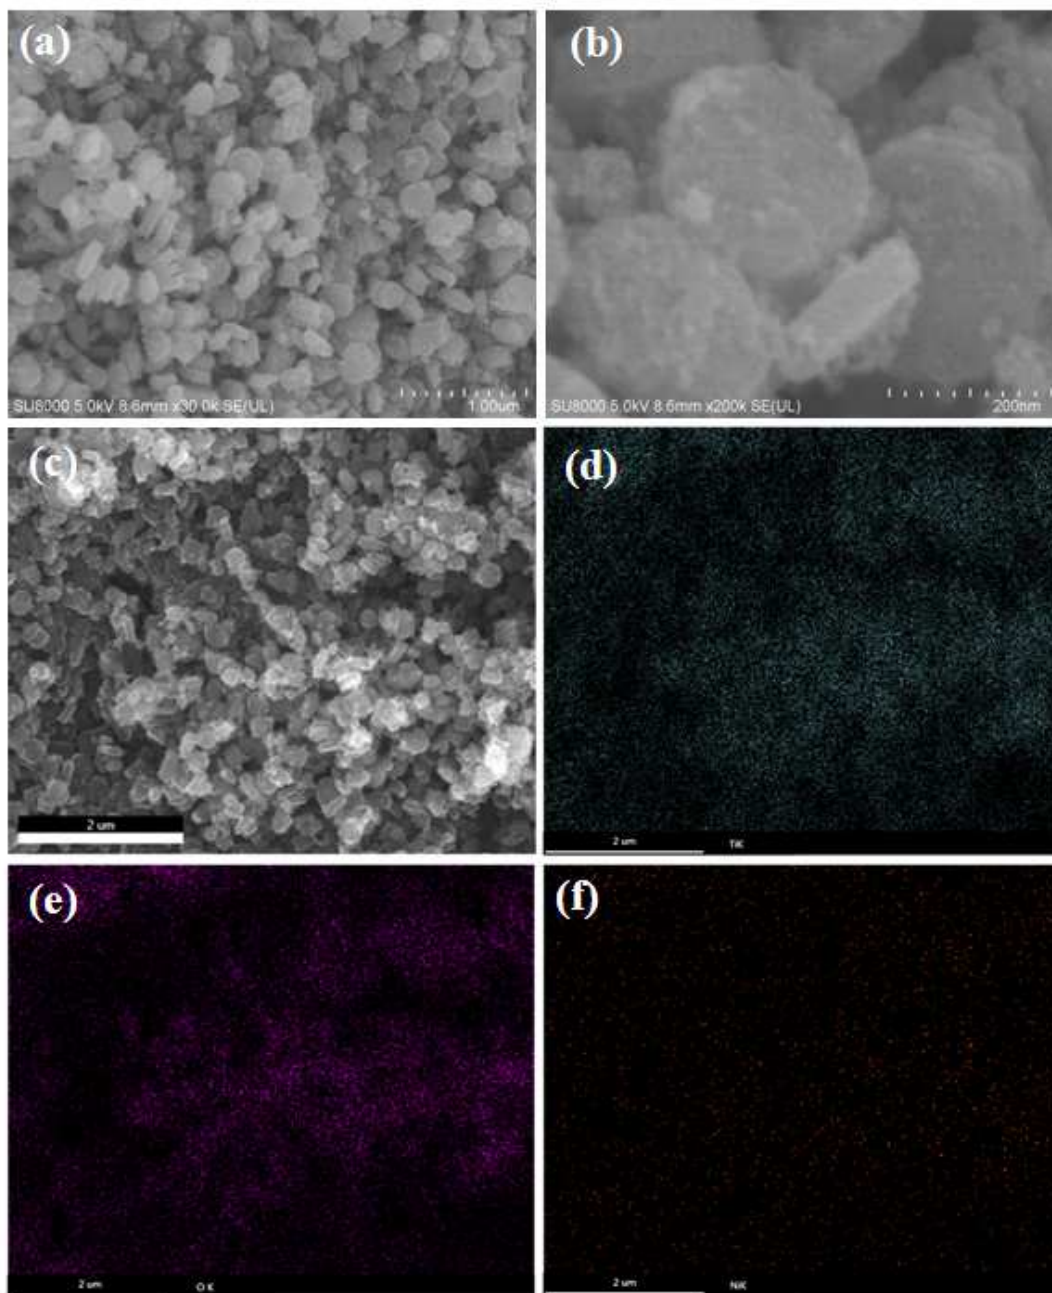

**Figure S4.** (a) and (b) SEM images of  $\text{Ni}^{2+}$  doping  $\text{TiO}_2$  nanodisks, (c-f) corresponding EDX elemental mapping Ti, O and Ni.

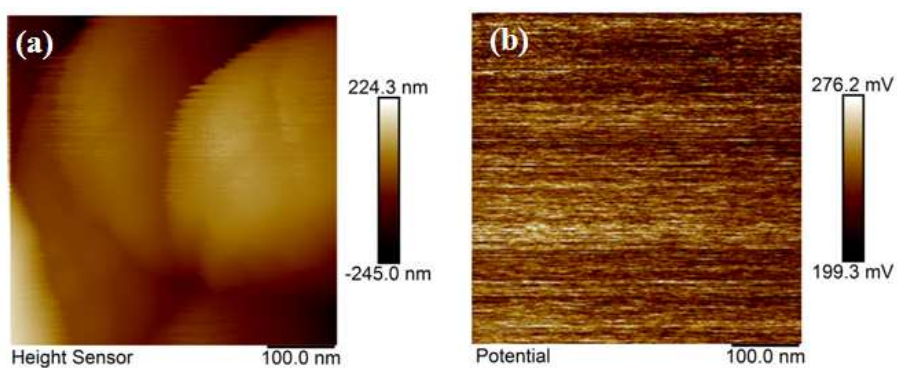

**Figure S5.** Topography (a) and (b) surface potential maps of  $\text{TiO}_2\text{-16Co}$ .

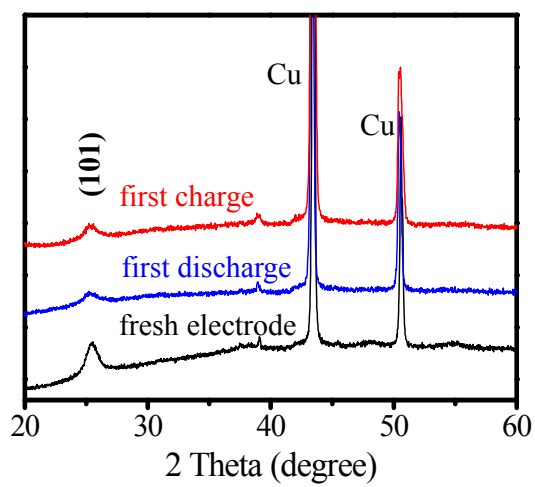

**Figure S6.** XRD patterns  $\text{TiO}_2\text{-32Co}$  electrode at various states.
